# Supplementary material
Source: PubMed Central journal article supplement (PMC5841080)
Supplement: NIHMS943180-supplement-supplementary_figures.pdf [file NIHMS943180-supplement-supplementary_figures.pdf]

## Supplemental Information

### The Structure of MESD45–184 Brings Light

### into the Mechanism of LDLR Family Folding

Christian Köhler, Janet K. Lighthouse, Tobias Werther, Olav M. Andersen, Annette Diehl, Peter Schmieder, Jianguang Du, Bernadette C. Holdener, and Hartmut Oschkinat

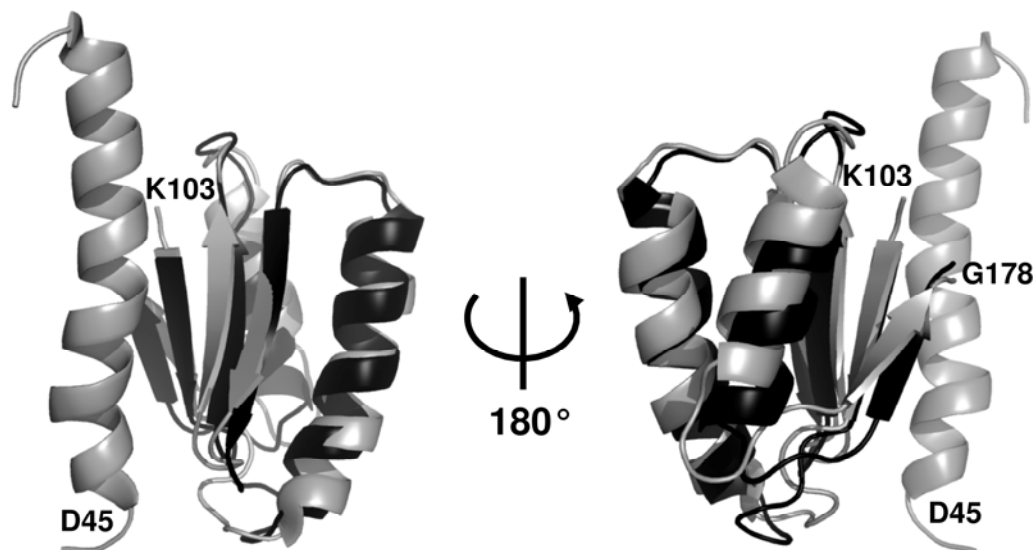

**Figure S1, related to Figure 2.**

**The core domain structure remains the structural integrity within MESD45-184**

Superposition of the core domain structure of MESD89-184 (black) with MESD45-184 (grey). The N- and C-termini are marked.

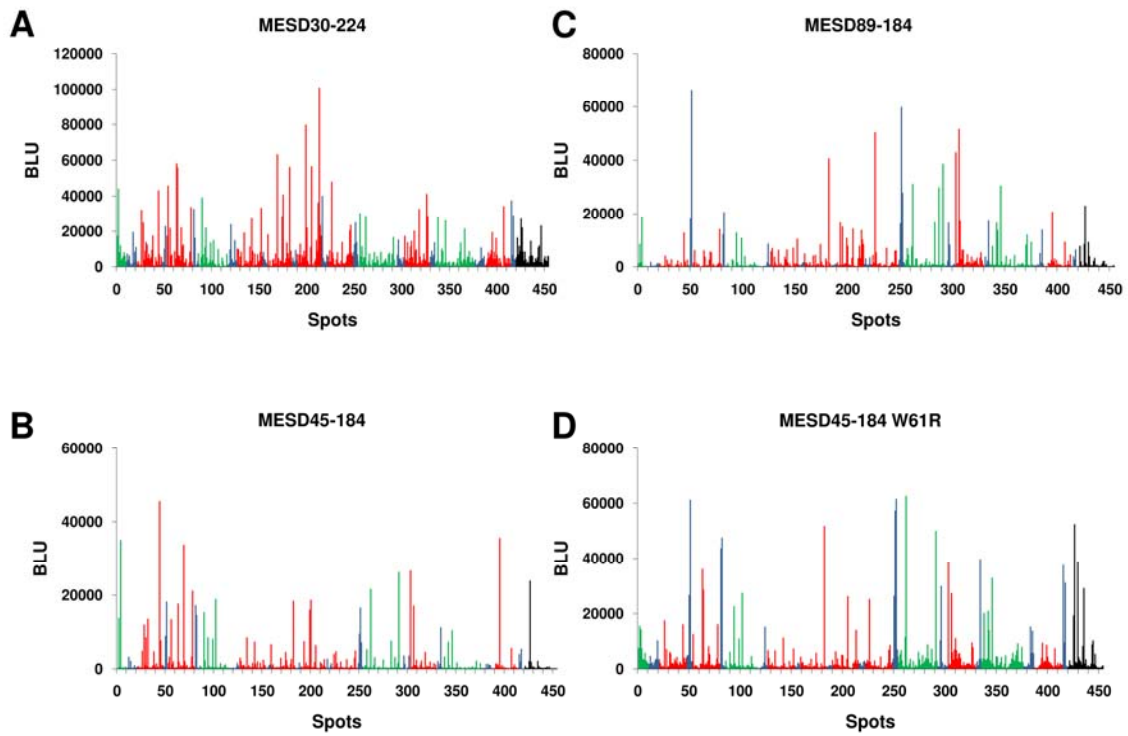

**Figure S2, related to Figure 6.**

**Interaction studies between different MESD truncations and short unfolded receptor fragments**

The amount of bound **A: MESD30-224** **B: MESD45-184** **C: MESD89-184** and **D: MESD45-184W61R** detected as chemiluminescence in Boehringer Light Units (BLU) for each fragment of the LRP1 receptor is illustrated. The fragments are colored with respect to the domain from which they are derived. **red:**  $\beta$ -propeller domain **blue:** EGF domain **green:** complement type domain **black:** others. MESD45-184 binds to the same receptor pattern then full length MESD. MESD 89-184 and the W61R mutant show a different binding pattern.
